# Supplementary material for: Observations of ocean currents and turbulent mixing in the Dotson Ice Shelf cavity
Source: Copernicus journal article supplement (doi:10.5194/egusphere-2025-1994), 2025-05-14
Supplement: Supplementary file [file egusphere-2025-1994-AC1-supplement.pdf]

# Response to reviewer R1 comments

June 23, 2025

Thank you for your detailed review, we will be commenting on the comments by reviewers R1 and R2 separately and upload full responses to reviewers, tracked changes and a revised manuscript after the discussion phase has ended. In this document, reviewer comments are in **black** and our comments are in **red**.

This is a clearly written paper with nice figures describing nice analysis of an extraordinarily rare and hard to obtain dataset. The manuscript should be published.

Thank you for your positive assessment of our paper, we will address your individual points below

I do have a number of comments, questions and morsels for thought that I list below in the order in which I read. The majority are (very) minor, amounting to text and grammar nits, but some are more substantive. In particular I would like to see

- more supporting evidence behind the claim that mixing is weak (for the reasons given in the final comment below),

Could you elaborate on the type of evidence you are looking for? We show that the median TKE dissipation rate is  $10^{-11}$  to  $10^{-10}$ , which are very low values, comparable to the background TKE dissipation rate

23 in the ocean.

- 24 • better figure 3 and 4, which currently mixes aspect ratios, has the  
25 reader going back and forth and does not allow direct comparisons  
26 of the most relevant quantities - specifically epsilon and the different  
27 instability indicators

28 We will adjust Figures 3 and 4 to have the same aspect ratio and trial  
29 different combinations of the data in our revised submission.

- 30 • quantification of the ADCP vertical wavenumber response and hence  
31 justification of the numerical values of  $Ri$  presented (or alternately ton-  
32 ing down the reference to specific values such as  $Ri = 1/4$  given the  
33 estimates are noisy and not fully resolved),

34 We are unsure what the reviewer is asking about here. Do you refer  
35 to the vertical wave number response that Polzin et al. (2002) refer to  
36 when estimating turbulent mixing processes from vertical shear in the  
37 ADCP? We do not use the ADCP to calculate mixing, we only use  
38 it to get information on the horizontal velocity in the vicinity of our  
39 microstructure shear measurements. The Richardson number is calcu-  
40 lated from the vertical shear between successive 8 m tall (in the vertical)  
41 ADCP bins, but this is not used for the turbulent shear calculations.  
42 Could you clarify what you are concerned about here?

- 43 • justification for use of median versus mean

44 We use the median as it is less impacted by outliers or non-normal  
45 distribution of values. If the data is normally distributed the median  
46 and mean are identical, so there is no negative effect of using the median  
47 as the default method of averaging values.

- 48 • and finally and perhaps most substantively, an explanation for why the  
49 turbulent heat fluxes just above the bottom are important to measure.  
50 Ie, is that the water that will eventually meet the grounding line, or  
51 should the study have been done nearer the top of the mCDW water-

52 mass where the gradients and heat losses are much stronger?

53 We will add information to the text to clarify that we measure heat  
54 fluxes close to the bottom to capture the effect of topography roughness  
55 on the flow, to capture the mixing where the bottom intensified warm  
56 inflow interacts with the seabed and due to practical constraints (the  
57 ALR needs to stay within 100 m of the seabed to allow for accurate  
58 dead-reckoning and bottom tracking).

59 Good luck. I enjoyed reading the paper and hope that these comments are  
60 useful.

61 11: topography, turbulent or both not resolved?

62 We will clarify this sentence to confer that turbulent mixing is not resolved  
63 in models and topography is not resolved in bathymetry products or models.

64 26: awkward

65 35, 53: “this” is a weak reference. Please reword; see Strunk and White if  
66 needed.

67 48: Melt rates two words?

68 We will correct this

69 52: This statement is actually not true: epsilon is the dissipation rate and  
70 further assumptions must be invoked to infer the mixing. This needs to be  
71 corrected and expanded upon.

72 We will expand our wording here to emphasis that certain assumptions need  
73 to be fulfilled to associate epsilon with turbulence, such as Taylor’s frozen  
74 turbulence hypothesis.

75 55: This would be a good place to distinguish what is different about this  
76 study from the other two.

77 We will add words to that effect here.

78 56: which  $- >$  that. Also, is this the only reason mixing is important to  
79 know for these situations?

80 mixing at the seabed – ocean interface is also important for nutrient trans-  
81 port, such as the transport of iron from sedimentary sources to the euphotic  
82 zone. We refer to such processes in the paragraph above.

83 66-68: Please give order of magnitude of the clock offsets before correction  
84 and the precision of the alignment afterwards.

85 We will add this information in the revised manuscript.

86 74: Please explain why you used median instead of mean?

87 See our explanation above.

88 95: Could indicate this is likely because of  $F = ma$ ; ie the same force on the  
89 huge autos produces much smaller accelerations.

90 We will add a note in the revised document speculating that the lower impact  
91 of vibrations on ALR compared to smaller craft is due to the greater weight  
92 of the vehicle.

93 105: on which this study focuses.

94 This will be changed in the revised manuscript.

95 105 general: is this the first paper that presents the details of shear mi-  
96 crostructure from Autosub? Surprising if so but if true, you might consider  
97 showing a few spectra and additional details, possibly in an appendix, so  
98 that future work can cite this paper.

99 This is not the first such paper, we refer the reader to Davis et al. (2022)  
100 for information of the spectral response of the shear probes on ALR. This  
101 reference will be added to the revised manuscript.

102 111: Shih et al is a very bad reference for this! They find a  $Re_b$ -dependent  
103 Gamma. Suggest just citing Osborn (1980). There are also now a handful of

104 observational references supporting the assertion that  $\Gamma = 0.2$ .

105 Thank you for pointing this out, we will remove the reference to Shih. If you  
106 can point us toward the observational studies that find  $\Gamma = 0.2$ , we would be  
107 interested in seeing them.

108 113: How close to the bottom of the ice is the shallowest CTD measurement  
109 shown? The very strong gradients at the very top of the cavity CTD casts  
110 (Fig 2 black) are interesting.

111 The CTD cast goes right to the ice – ocean interface. We refer the reader  
112 to Wåhlin et al. (2024) for a discussion of the CTD measurements at the  
113 interface.

114 123 and throughout: I believe units should be in roman, not italicized, font.

115 We have corrected this where we found such instances, all remaining format-  
116 ting will be finalized in the copy editing process.

117 136: Suggest reformatting the equation.

118 This will be reformatted in the revised document

119 140: Please make it very clear that  $Ri$  (under the ice at least) is based on a  
120 single  $N_2$  profile whereas the shear is a function of location and time. This  
121 is OK, but appropriate caveats as to its governing local instabilities without  
122 in-situ  $N_2$  should be given.

123 We will add additional words to this effect to the revised manuscript

124 173: Generally, avoid “there is” in favor of more active language such as  
125 “flow is to the ...”

126 We will change some of our wording where we deem appropriate in the revised  
127 manuscript

128 177: High compared to what?

129 We will add context that epsilon is high compared to the range of epsilon

130 observed at the ice shelf front.

131 177: runon sentence.

132 In addition to adding context (see above), this sentence will be split into  
133 shorter sentences.

134 Figure 3, lines 2 and 4 of caption: runon sentences. Also, the dots are said  
135 to indicate the starting locations - but they are a continuous line. I'd have  
136 thought there would just be two starting locations, one for center and one  
137 for east? Please clarify.

138 We are unsure what you mean by "dots are said to indicate starting loca-  
139 tions". There are two large dots with a black outline that show the values  
140 at the starting locations of the east and centre tracks. All other dots show  
141 the 10-minute median of the values of the "along" dive track. If we make it  
142 clear that we plot the 10-minute median of the ALR values along the dive  
143 track, would that solve the issue?

144 Figure 4: Personally I think it would be better to keep the aspect ratio  
145 constant between Fig 3 and 4. Also, sine you already plotted velocity in  
146 Figure 3, suggest including a panel of N2. The aspect ratio is all the more  
147 a problem later when the authors are comparing epsilon to the different  
148 instability indicators - but the reader must go back and forth between figure  
149 3 and 4. Suggest standardizing the aspect ratio and including an epsilon  
150 panel in Figure 4. Possibly even adding Ri contours to the epsilon panel or  
151 epsilon contours to the Ri panel since the authors are trying to demonstrate  
152 correspondence between the two quantities.

153 Thank you for this feedback, we will standardise the aspect ratio between  
154 Fig 3 and Fig 4 and trial your suggestions regarding N2, epsilon and Ri  
155 in the revised manuscript. However we may decide not to adopt a specific  
156 suggestions due to readability or an excessive number of subpanels.

157 Also, the Ri panel is just a big sea of red. Consider plotting something else  
158 to highlight the unstable regions such as  $Ri^{-1}$  or  $Fr = Uz/N$ .

159 The Ri panel is mainly red due to the choice of colourbar. We chose to plot  
160  $Ri < 1/4$ ,  $1 > Ri > 1/4$ , and  $Ri > 1$  as three different colours in keeping  
161 with established practice to distinguish along criteria for instability. Plotting  
162  $1/Ri$  would make it less obvious where  $Ri < 1/4$ . We would like to avoid  
163 plotting additional instability metrics such as the Froude number to avoid  
164 confusion.

165 182: Doesn't negative PV mean unstable? The whole water column is unsta-  
166 ble? Is it backwards in the southern hemisphere? Some statements to clarify  
167 would be useful.

168 Instabilities may develop when PV and  $f$  have opposite signs, as  $f$  is nega-  
169 tive in the southern hemisphere,  $PV > 0$  indicates conditions favourable to  
170 instability. We will clarify this in the text.

171 188: I don't agree with this statement - the high dissipation does not appear  
172 to me to line up at all with for Ri. Furthermore, given the ADCP's finite  
173 vertical resolution and noise, some additional detail needs to be given on  
174 how seriously we are to take the numerical value of Ri. I think that either  
175 some wavenumber spectra and transfer functions a la Polzin 2002 need to be  
176 included, or Ri used as a qualitative indicator.

177 As far as we understand Polzin et al., 2002 the vertical wavenumber response of  
178 the ADCP is relevant when calculating turbulent dissipation from the ADCP.  
179 We are not using the ADCP for turbulence. We use the VMP or microRider  
180 for shear microstructure and the LADCP and ADCP on the ALR to get an  
181 idea of the vertical and horizontal structure of the water column at much  
182 larger scales, a background value if you will. Ri is frequently calculated from  
183 LADCP output with bin sizes of 8 m. If you have additional concerns could  
184 you be more specific on how Ri would be affected by the ADCP resolution?  
185 And what you mean by "wavenumber spectra and transfer functions"?

186 191: I disagree; elevated mixing is much broader than the regions of  $Ri < 1/4$   
187 - augmenting my previous point.

188 We will clarify that the high epsilon includes, but extends beyond, the region  
189 of low Ri. Can you clarify how this is related to your previous point?

190 193: This statement is not justified. Epsilon appears surface intensified as  
191 well. And while it is bottom intensified, I do not think the statement that  
192 it is heightened over rough topography, shear or high currents (of which  
193 you generally must choose either high current or high shear, not both...) is  
194 supported. And as before, I don't think that high epsilon lines up with low  
195 Ri either. Either way, if this statement is retained, more analysis needs to  
196 be shown - scatter plots, binned averages, etc.

197 We will clarify that we are only considering epsilon below the Winter Water  
198 layer (approx 400 m), thus we do not discuss high epsilon at the surface.  
199 Can you clarify why you think high current speed can not coincide with high  
200 current shear? We will include scatter plots in our response to reviewers,  
201 however, as we state in the manuscript, the relationship between topography,  
202 shear and epsilon that we find around 0 km in the east dive track is not valid  
203 everywhere. Additionally, the bathymetry gradient deeper in the cavity is  
204 affected by the low resolution of bedmachine, making correlations and scatter  
205 plots noisy.

206 197: runon sentence. And seemingly unrelated sentences. Ri governs shear  
207 instability, not symmetric instability. . . (I understand they are highly corre-  
208 lated here, but they are different, so clarification is needed).

209 We will insert a paragraph break before "at the nearby Pine Island Ice  
210 Shelf....". We will clarify that SI is not governed by Ri.

211 202: What is a barotropical jump?

212 It is an oceanographic term for an abrupt change in water column thickness.  
213 This occurs at the ice shelf front, since ocean currents want to flow along  
214 lines of uniform water column thickness, the ice shelf draft poses a barrier to  
215 flow, even at depths deeper than its draft.

216 207: Please rewrite this passive and vague sentence.



217 We will rewrite this sentence in the revised manuscript.

218 204-210: Suggest moving this speculative bit to the discussion.

219 We originally had results and discussion split, but chose to integrate them to  
 220 avoid duplicating information and to limit jumping back and forth between  
 221 topics. We will retain this structure.

222 216: I think it would be nice to compare this to open ocean values at a  
 223 similar depth and/or abyssal values, for context. Otherwise “weakly stable”  
 224 doesn’t have meaning.

225 We will add typical open ocean values for N2.

226 218: Style guides such as Strunk and White suggest avoiding “Figure x  
 227 shows...” in favor of “statement x is true (Figure y).”

228 We will rephrase this sentence.

229 223: Figure 6 and 5 -> Figures 5 and 6

230 Thank you for pointing out this typo

231 236: redundant. Suggest “Maximum values were” or “Values reached.”

232 We will change this in the revised manuscript

233 238: Again, I’m afraid I don’t see this. There are counter examples where  
 234 epsilon is high over flat bottoms. Please include plots that allow direct com-  
 235 parison such as plotting epsilon with  $R_i$ , current speed or bathymetric slope  
 236 over plotted, or scatter plots or binned averages (e.g.  $\epsilon(R_i)$  etc) if you  
 237 want to make this claim.

238 We will clarify that we are not making statements about a universal rela-  
 239 tionship. Turbulence is influenced by many factors, some only incompletely  
 240 resolved in our study, or not resolved at all. Our statement is a qualitative  
 241 observation that can explain many of the observed patches of high turbu-  
 242 lence, though you are right that there are regions where this relationship

243 may be absent or obscured by the limitations of our study.

244 241: Please remind reader that it's Ri computed from in-situ where and

245 The remainder of this sentence seems to be missing, please clarify

246 245: Again, please include transfer function and instrument response infor-  
247 mation if you wish to quantify the numerical value of Ri versus using it as a  
248 qualitative indication. Note as well that these transfer functions and hence  
249 the mapping of true to measured Ri will be different for the Autosub and the  
250 LADCP.

251 Can you clarify what you mean by the mapping of true to measured Ri and  
252 how that is influenced by the ADCP? It is common practice to calculate Ri  
253 from vertical shear from the 8 m binned ADCP and we do not use the ADCP  
254 to calculate fine scale microstructure.

255 257: Is it really necessary to use a package like this to compute a spatial  
256 gradient? More fundamentally I do not see a relationship between RMS  
257 bathymetric slope and dissipation rate.

258 I do not use a package to calculate the gradient. The bathymetry from ALR  
259 is only 1D, to get a 2D gradient I use bedmachine to get the bathymetry  
260 normal to and along the ALR dive track. Can you clarify what you mean  
261 by "RMS bathymetric slope"? We do not calculate RMS of the slope and  
262 to our eyes there is a clear relationship between the bathymetry and epsilon  
263 close to 0 km on the east dive track.

264 264 onwards: consider moving all of this comparison to past work to the  
265 discussion, so that the results section just has your results?

266 A previous draft had results and discussion separated and the feedback from  
267 several readers was that this caused unnecessary confusion, duplication and  
268 jumping back and forth. We will keep the results and discussion merged.

269 270: I'm confused here, sorry. Weren't the ALR measurements entirely in  
270 the warm inflow, since they were so deep?

271 We will clarify this sentence, you are correct that all our ALR measurements  
272 are in the warm layer of in the cavity, but we define the inflow as the narrow  
273 bottom intensified current along the 700 m isobath.

274 272: runon sentence.

275 The sentence in line 272 is not that long, are you sure that this is the line  
276 number you meant?

277 273: Due to what mechanism? We will add this information in the revise  
278 manuscript.

279 281: Please change “this” to “their” to avoid confusing with your study.

280 we will make this change in the revised manuscript.

281 285: If you are going to state dissipation rates this low, I think you do need  
282 to demonstrate your minimum detectability threshold. Earlier you said it  
283 was  $1e-10$ . So how then do you get a median lower than this.

284 The detection limit is between  $10^{-11}$  and  $10^{-10}$  depending on the dive track.  
285 We never state that the detection limit is  $10^{-10}$  and will clarify the sentence  
286 you refer to.

287 Again, I think median should be avoided for all quantities unless there is a  
288 good reason. Why not just use the mean?

289 We do not want to cause confusion by switching between mean and median for  
290 data with and without outliers or non-normal distributions, since  $\text{median}(x)$   
291  $= \text{mean}(x)$  when  $x$  is normally distributed we think median is a better choice.

292

293 333: The reason for these calculations is revealed here - suggest giving it ear-  
294 lier to make the reader understand why they are being told all of this. More  
295 fundamentally, is that the only reason turbulence is important to measure  
296 under ice shelves? Ie, as a possible mitigator of the advective heat flux by  
297 these warm flows?

298 We will move the motivation for the mixing calculation to earlier in the  
299 paper. As far as the ice melt rate and modelling efforts in the cavity are  
300 concerned the heat flux is the major concern. As we discuss above, mixing  
301 is also important for the trace metal and nutrient transport, however we do  
302 not have measurements of concentration gradients in the cavity and can not  
303 make a statement as to how the mixing influences them.

304 I, at least as a non ice sheet person, would like to see a cartoon (words  
305 or actual graphic) showing a cross section of the hypothesized warm water  
306 flow to the grounding line. The reason for this is that I don't currently  
307 understand why the study focused so much on the near-bottom mixing. I'd  
308 think that the heat loss out of the mCDW would be better quantified near  
309 its upper edge. As the authors point out, the water near the bottom is  
310 very weakly stratified so the heat fluxes are expected to be small. Aloft  
311 nearer the interface, the gradients would be stronger, but also the distance  
312 from the topography which is presumably generating most of the turbulence  
313 (my comments above about that not having been adequately demonstrated  
314 notwithstanding). So, statements that mixing is weak such as on lines 356-  
315 258 should be tempered somewhat. And I think the cartoon or written  
316 description of the flow giving readers the sense of which depths are thought  
317 the most likely to eventually contact the ice would help inform this discussion,  
318 at least for me.

319 We will add a cartoon to the revised manuscript, thank you for the sug-  
320 gestions. As a short description of why the bottom layer of mCDW is so  
321 important is that the grounding line (the region where the ice flow contacts  
322 the ocean and comes afloat) is the area where most melting and glacier retreat  
323 takes place.

## 324 References

325 Davis, P. E. D., Jenkins, A., Nicholls, K. W., Dutrieux, P., Schröder, M.,  
326 Janout, M. A., . . . McPhail, S. (2022, November). Observations of Modi-  
327 fied Warm Deep Water Beneath Ronne Ice Shelf, Antarctica, From an Au-

- 328 autonomous Underwater Vehicle. *Journal of Geophysical Research: Oceans*,  
329 127(11). doi: 10.1029/2022jc019103
- 330 Polzin, K., Kunze, E., Hummon, J., & Firing, E. (2002). The finescale  
331 response of lowered ADCP velocity profiles. *Journal of Atmospheric  
332 and Oceanic Technology*, 19(2), 205–224. doi: 10.1175/1520-0426(2002)  
333 019<0205:tfrola>2.0.co;2
- 334 Wählin, A., Alley, K. E., Begeman, C., Hegrenæs, Ø., Yuan, X., Graham,  
335 A. G. C., . . . Heywood, K. J. (2024, August). Swirls and scoops: Ice base  
336 melt revealed by multibeam imagery of an Antarctic ice shelf. *Science  
337 Advances*, 10(31). doi: 10.1126/sciadv.adn9188
