# Supplementary material for: Observations of ocean currents and turbulent mixing in the Dotson Ice Shelf cavity
Source: Copernicus journal article supplement (doi:10.5194/egusphere-2025-1994), 2025-05-14
Supplement: Supplementary file [file egusphere-2025-1994-AC3-supplement.pdf]

# Response to reviewer R2 comments

August 22, 2025

Thank you for your detailed and helpful review. In this document, reviewer comments are in **black** and our comments are in **red**. New text added to the manuscript is in **blue**.

This paper discusses microstructure observations made beneath Dotson Ice Shelf using an Autonomous Submersible Vehicle. The data appear to lack the temporal and spatial coverage that would enable substantive conclusions to be drawn about the role of turbulent mixing in the larger-scale processes that operate beneath the ice shelf. They are, nevertheless, intrinsically interesting, in that they represent some of the very few direct observations that we have from within a sub-ice-shelf cavity. That remote part of the ocean plays a pivotal role in setting the mass balance of the Antarctic Ice Sheet and hence its impact on global sea level, so any observations are of value. I would therefore recommend publication of the paper with only relatively minor changes.

Thank you for your positive assessment of our manuscript. We agree that a greater spatial and temporal range of observations in ice shelf cavities is needed to gain a complete picture of the water mass transformations, heat and (fresh)water transport that influence Antarctic ice mass loss, grounding line retreat, sea level rise, deep water formation and nutrient transport. Until such measurements are routinely possible, we intend our manuscript to offer a glimpse at conditions and possible processes.

25 Suggested changes:

26 Title:

27 It's a minor point, but the current title does not reflect the content of the  
28 paper very well. It promises observations of ocean currents. While they are  
29 included there is very little discussion of them, and no more space is devoted  
30 to currents than to water properties.

31 We have changed the title of the paper to: "Observations of turbulent mixing  
32 in the Dotson Ice Shelf cavity"

33 Abstract:

34 Reflects the content of the paper and thus its main weakness, which is a  
35 lack of substantive conclusions. I accept that it is hard to put such detailed  
36 observations into a broader context, especially when they are made in such a  
37 data-poor region. However, I wonder if it might be possible to put an order  
38 of magnitude estimate on the cavity-wide mean vertical heat flux, given es-  
39 timates of inflow/outflow temperatures, residence time, melt rate, etc. That  
40 would put the numbers quoted in the abstract into a useful context.

41 Thank you for this suggestion. We have modified our abstract to read:

42 "Average vertical heat fluxes are on the order of  $0.1 \text{ W m}^{-2}$  and maxi-  
43 mum heat fluxes reach  $52 \text{ W m}^{-2}$ . This is compared to the  $59 \text{ W m}^{-2}$  to  
44  $176 \text{ W m}^{-2}$  needed to maintain observed average basal melt rates at DIS.  
45 Turbulent mixing is higher in the fast-flowing inflow region and over rough  
46 topography. We show a highly complex spatial pattern of turbulent mixing  
47 and of bottom topography. The bottom topography is currently not resolved  
48 in bathymetry products and both the topography and turbulent mixing are  
49 currently not resolved in models of ice-shelf-ocean interactions. The levels  
50 of turbulent mixing experienced by the warm mCDW inflow to the DIS will  
51 lead to negligible loss of heat during its path to the grounding line, leaving  
52 plenty of heat available to melt the ice shelf base there. Higher average ver-  
53 tical heat fluxes than observed here must occur in areas of the cavity not

54 resolved in this study. ”

55 We have expanded on your suggestion and added the following to our results  
56 section:

57 “We can estimate the DIS basal melt, assuming that the entire heat flux is  
58 used to melt ice at a depth of approximately 1000 m. With this assumption  
59 the melt rate  $m$  is

60

$$m = \frac{Q_t}{L_i \rho_i} \quad (1)$$

61

62 with  $L_i = 3.315 \times 10^5 \text{ J kg}^{-1}$  the latent heat of fusion at 1000 dbar, and  
63  $\rho_i = 917 \text{ kg m}^{-3}$  the density of ice. This results in melt rate estimates of  
64  $2 \times 10^{-3} \text{ m yr}^{-1}$  to  $11 \times 10^{-3} \text{ m yr}^{-1}$ . Published estimates for area averaged  
65 melt rates under DIS range from  $6.1 \text{ m yr}^{-1}$  to  $18.3 \text{ m yr}^{-1}$  (Gourmelen et al.,  
66 2017; Lilien et al., 2018; Robertson, 2013; Jenkins et al., 2018; Schodlok et  
67 al., 2012) with some estimates up to  $32.9 \text{ m yr}^{-1}$  (Jenkins et al., 2018). The  
68 low upward heat flux within the mCDW layer is thus not able to maintain  
69 the observed melt rates under DIS. To achieve the melt rate estimates from  
70 (Gourmelen et al., 2017; Lilien et al., 2018; Robertson, 2013; Schodlok et al.,  
71 2012; Jenkins et al., 2018) the vertical heat flux would need to be greater than  
72  $59 \text{ W m}^{-2}$  to  $316 \text{ W m}^{-2}$ , values three to four orders of magnitude larger than  
73 our median estimates and up to six times our maximum estimate (Table 2).

74 Davis et al. (2025) showed elevated levels of  $\varepsilon$  in the ice–ocean boundary  
75 layer under Thwaites, and Kimura et al. (2016) observed elevated values of  $\varepsilon$   
76 close to the ice–ocean interface and over a bathymetric ridge in front of the  
77 PIIS grounding line. In these areas high turbulent kinetic energy dissipation  
78 rate and high vertical and horizontal temperature gradients lead to high  
79 temperature fluxes. Our study did not reach the ice–ocean boundary layer  
80 or the ridge limiting flow to the DIS grounding line (Figure 1) which may  
81 explain the underestimate of the area averaged ice shelf melt rate using the  
82 observed heat fluxes. The value for  $\kappa$  for stably stratified water, used in the

ISOMIP+ protocol, matches our estimate of  $\kappa$ . Thus, modelled vertical heat transport, in regions for which this estimate is used, could also be too low to explain observed ice shelf melt rates. The low heat fluxes in the interior of ice shelf cavities would need to be offset by higher heat fluxes at the grounding line and in the ice–ocean boundary layer.

We can additionally estimate a melt rate for DIS from the temperature difference between the inflow and the outflow of the cavity and the average residence time of water within the cavity. We take the heat needed to warm the ice shelf to the freezing point temperature and the heat needed to warm the melt water to the temperature of the outflow into account. A back-of-the-envelope calculation for melt rate gives:

$$m = \frac{V_{in} C_p \bar{\rho} (\theta_{in} - \theta_{out})}{\rho_i A_{DIS} (C_i (\theta_f - \theta_{ice}) + L_i + C_p (\theta_{out} - \theta_f))} \quad (2)$$

with  $V_{in} = v_{cavity} A_{inflow}$ , the volume transport in the inflow;  $v_{cavity} = \frac{D}{t}$  the velocity of the inflow;  $D$  the distance water has to travel from the ice front to the grounding line and back;  $t$  the time the water takes to travel to the grounding line and back;  $A_{inflow}$  the area through which water flows into the cavity;  $A_{DIS}$  the area of the DIS;  $C_i$  the specific heat capacity of ice at  $-2^\circ\text{C}$  and 1000 db;  $\theta_f$  the freezing point temperature of seawater;  $\theta_{in}$  the average temperature of the inflow to DIS;  $\theta_{out}$  the average temperature of the outflow from DIS;  $\theta_{ice}$  the far-field internal temperature of the DIS.

We assume the following values for these parameters:  $D = 240$  km (Figure 1);  $t = 2$  months (Milillo et al., 2022; Yang et al., 2022; Girton et al., 2019);  $A_{inflow} = 500 \text{ m} \times 15 \text{ km}$  (solid box in Figure 3);  $A_{DIS} = 5200 \text{ km}^2$  (Lilien et al., 2018);  $\theta_f \approx -2^\circ\text{C}$ ;  $\theta_{in} = 0.2^\circ\text{C}$  (the average temperature in the solid box in Figure 3);  $\theta_{out} = 0.17^\circ\text{C}$  (the average temperature in the dashed box in Figure 3, the outflow extends to shallower depths in the water column than the inflow due to the thinner ice shelf draft in the west of the DIS (e.g. A. Wåhlin et al., 2024).);  $\theta_{ice} = -25^\circ\text{C}$ , an estimate of the far-field ice temperature. Our estimate of melt rate and heat flux from in and outflow

112 temperatures is most sensitive to the area over which we average outflow  
113 temperatures (Figure 3) and represents an order of magnitude estimate only.

114 Equation 2 results in an estimate of the melt rate of  $\sim 10 \pm 5 \text{ m yr}^{-1}$ , which  
115 lies within the range of published values (e.g. Gourmelen et al., 2017; Lilien  
116 et al., 2018; Robertson, 2013; Schodlok et al., 2012; Jenkins et al., 2018).  
117 To maintain this melt rate the vertical heat flux in the cavity would need  
118 to be  $100 \pm 50 \text{ W m}^{-2}$ , about three orders of magnitude higher than the  
119 median values along the east dive track (Table 2). Rearranging Equation 2  
120 allows us to estimate the percentage of the heat entering the ice shelf cavity  
121 that is used to melt ice. We estimate that the inflow transports  $4 \pm 2 \text{ TW}$   
122 into the cavity and the melt takes up  $0.6 \pm 0.4 \text{ TW}$ , thus, only  $\sim 15 \pm 9 \%$   
123 of the heat entering DIS is used to melt the ice shelf. Modelling studies  
124 have estimated this value to be smaller, at 8 % (Jourdain et al., 2017), but  
125 within our error range. Transport calculations by Jenkins et al. (2018) yield  
126 the same range for heat flux into the cavity as our estimate does, however,  
127 their calculated melt rate, derived from melt water fluxes, is significantly  
128 higher ( $6 \text{ m yr}^{-1} - 33 \text{ m yr}^{-1}$ ). These melt rates would require heat fluxes of  
129  $60 \text{ W m}^{-2} - 317 \text{ W m}^{-2}$ . We need significantly more measurements under ice  
130 shelves to understand the role of mixing in different areas and regimes, and  
131 its effect on ice shelf melt rate.”

132 Introduction:

133 The first paragraph talks about the DIS contribution to Amundsen Sea “mass  
134 loss”, suggesting that the term refers to shrinkage of the ice sheet. However,  
135 the latter part of the paragraph partitions “mass loss” for the ice shelves  
136 between calving and melting. In this instance the term does not refer to  
137 shrinkage of the ice shelves, but the contribution to the wastage side of the  
138 mass budget. Those are different concepts, and the distinction should be  
139 clarified.

140 Thank you for pointing out this ambiguity, we have rephrased this paragraph  
141 to now only refer to ice sheet mass loss and basal melt/thinning of the ice  
142 shelf. The revised paragraph now reads “Between 1979 and 2017 DIS con-

143 tributed 0.6 mm to global eustatic sea level rise (Rignot et al., 2019). The rate  
144 of discharge across its grounding line has increased throughout the satellite  
145 record (Rignot et al., 2019; Mouginot et al., 2014) and the grounding line has  
146 retreated (Rignot et al., 2014; Scheuchl et al., 2016; Milillo et al., 2022). The  
147 increased ice flux across the Dotson grounding line, coupled with the stable  
148 ice flux across the calving front (Rignot et al., 2013; Mouginot et al., 2014)  
149 and the increased thinning of the ice shelf (Rignot et al., 2013; Mouginot et  
150 al., 2014; Gourmelen et al., 2017; Greene et al., 2022) leads to the conclu-  
151 sion that ocean thermal forcing has increased basal melt of the ice shelf (e.g.  
152 Mouginot et al., 2014). Dotson has thinned at a 37% higher rate than the  
153 average rate of thinning in the Amundsen Sea (Paolo et al., 2015). ”

154 The last paragraph states that there have been only two previous published  
155 studies of mixing beneath ice shelves, but that overlooks studies based on  
156 borehole data. The oversight is repeated in other parts of the manuscript.

157 This is a good point. We clarify the Introduction, by referring to autonomous  
158 vehicles: “To our knowledge, there exist two published studies of mixing in  
159 an ice-shelf cavity measured by an underwater vehicle, one under Pine Island  
160 Glacier (Kimura et al., 2016), and one under the Filchner Ronne Ice Shelf  
161 (Davis et al., 2022). We present a third such study, targeting DIS.” and  
162 discuss comparisons with borehole results in the Discussion section. To our  
163 knowledge there are three published studies of successful measurements of  
164 mixing through ice shelf boreholes in the Antarctic (Davis & Nicholls, 2019;  
165 Venables et al., 2014; Davis et al., 2025), but if you are aware of others we  
166 have missed, we would happily include them. We have added the new Figure  
167 8 and the following paragraph to the revised manuscript:

168 “The highest levels of turbulent mixing occur in the inflow region at the ice  
169 front and in the east dive track, decreasing into the cavity (Figure 5 and  
170 Figure 6). The east dive track clearly shows the highest values for  $\varepsilon$  of the  
171 three ALR dive tracks at DIS (Figure 8). The range, maximum and me-  
172 dian values of  $\varepsilon$  measured with the VMP at the ice front are higher than  
173 those observed in the cavity with the ALR, but ranges have a wide overlap.

174 We compare our observations of turbulent kinetic energy dissipation rate  
175 with other observations under Ronne Ice Shelf (measured using a MicroR-  
176 ider mounted on an ALR; Davis et al., 2022), George VI Ice Shelf (measured  
177 with a VMP through a borehole; Venables et al., 2014), Thwaites Ice Shelf  
178 (measured with a VMP through a borehole; Davis et al., 2025) and Larsen C  
179 ice shelf (measured with a turbulence instrument cluster moored close to the  
180 ice–ocean interface; Davis & Nicholls, 2019). The distributions of  $\varepsilon$  under  
181 Ronne and George VI have similar shapes and ranges to our observations  
182 (Figure 8). The VMP observations do, however, show much higher maxi-  
183 mum values. This is likely caused by the greater vertical extent of the VMP  
184 measurements, which reach into the ice–ocean boundary layer where  $\varepsilon$  is el-  
185 evated (Davis et al., 2025). This is confirmed by the measurements 2.5 m  
186 and 13.5 m from ice-ocean interface under Larsen C, which show the highest  
187 average values of  $\varepsilon$  of the measurements included in Figure 8. Further studies  
188 are needed to establish whether observed differences between ice shelves are  
189 driven by different mixing regimes or different observation techniques. The  
190 current state of knowledge leads us to conclude that the measurements taken  
191 under Dotson agree remarkably well with available distributions of  $\varepsilon$  from  
192 other ice shelves, outside of the ice–ocean boundary layer. ”

193 Data and methods:

194 On line 127 there is a parenthetical note to authors that has not been ad-  
195 dressed.

196 We are very sorry to have missed that! Thank you for pointing it out, the  
197 note has been removed.

198 On line 140 the dimensionless parameter could more precisely be referred to  
199 as a “gradient Richardson number”.

200 Yes, we will make that change.

201 On line 165 there is a mention of detiding LADCP data using CATS2008.  
202 Elsewhere it is stated that tides are unimportant, and CATS cannot be

203 trusted because of the poor bathymetry in the model. One comment refers  
204 to (mainly) sub-ice data and the other to ice front data, but nevertheless  
205 the treatment seems inconsistent. If bathymetry is poor beneath the ice,  
206 won't that influence currents at the ice front? If tides are weak enough to be  
207 ignored, why bother with detiding the LADCP data?

208 Thank you, we acknowledge that this is confusing for readers and have  
209 rephrased the text to make this clearer.

- 210 • As noted by the reviewer, the bathymetry is worse in the cavity than  
211 outside it due to a lack of observations in the cavity (as shown in Figure  
212 7), which is why we trust the CATS2008 model more at the ice front  
213 than in the cavity.
- 214 • At the ice front section we have ship ADCP for validation of the CATS  
215 model, making us more confident in the tide model solution for cor-  
216 recting the LADCP.
- 217 • The tidal currents at the ice front are indeed small  $O(1 \text{ cm s}^{-1})$  (Dotto  
218 et al., 2025).
- 219 • We expect the effect of tides in the cavity to be influenced by the  
220 barotropic jump at the ice front, something not well captured in the  
221 CATS model.
- 222 • We could not identify a tidal signal in our ALR ADCP time series in  
223 the cavity and thus we concluded that the error introduced by a faulty  
224 tidal model would likely be larger than the error caused by not detiding.
- 225 • On a practical point, the LADCP data were processed and detided by  
226 Dotto et al. (2025), and in order to stay consistent with Dotto et al.  
227 (2025) we use their detided dataset (Dotto, Tiago S et al., 2024) in our  
228 study.

229 We make these methodological approaches clearer in the revised paper. The  
230 relevant section of the methods now reads:



231 “Upward-looking and downward-looking LADCP measurements were pro-  
232 cessed with the LDEO\_IX toolbox, incorporating information from the vessel-  
233 mounted ADCP, CTD, GPS and bottom track from the LADCP (Thurnherr,  
234 2021). The processed data were averaged into 8-m vertical bins and detided  
235 using an updated version of the CATS2008 Antarctic tide model (Padman et  
236 al., 2002; Erofeeva et al., 2024). Modelled tidal current components are on  
237 the order of  $1 \text{ cm s}^{-1}$  at the ice front and the tide model agrees well with tides  
238 extracted from the shipboard ADCP data (Dotto et al., 2025). Conversely,  
239 the ALR ADCP data are not detided due to the ill-constrained bathymetry  
240 under DIS, the absence of a detectable tidal signal in a spectral analysis of  
241 the ALR ADCP currents in the cavity, and the risk of degrading the ADCP  
242 data quality with an ill-fitting tidal model. ”

243 Results and discussion:

244 In the title of section 3.1 and elsewhere in the manuscript the edge of the ice  
245 shelf is referred to as the “ice shelf front”. The correct term for that feature  
246 is the “ice front”.

247 We have made this change.

248 In figure 3, is there a “black line” showing the track of the ALR (third line  
249 of the caption)? I couldn’t see one.

250 Thank you for this feedback, we have removed the line (which is obscured in  
251 large parts by the coloured dots showing the ALR measurements along the  
252 track.) and the reference to it from the figure caption.

253 On lines 222-223 it is stated that water at the ice front is colder and lighter  
254 than that in the cavity. Does that refer only to measurements made with  
255 ALR? Was the warmer, saltier water apparent in the section observed with  
256 the ship? If not, I think it deserves some comment about where that warm,  
257 salty water may have come from? Waters in the cavity must be cooled and  
258 freshened, so the observation must say something about variability at the ice  
259 front. If, on the other hand, an equally warm, salty water mass is present in

260 the ship CTD data, then the statement in the paper is a little misleading.

261 The statement on lines 222–223 refers to the ship CTD section along the ice  
262 front. We have made this clearer in the revised paper. The revised paragraph  
263 reads:

264 “Water at the ice front (measured with the ALR and the ship CTD) is  
265 colder but lighter than water found deeper in the cavity (Figure 6). The  
266 temperature (Figures 6 and 5) and salinity (not shown) in the cavity generally  
267 increase with depth. The presence of warmer, saltier, and denser water in the  
268 cavity than at the ice front may indicate seasonal or interannual variability  
269 in the properties of the water at the ice front (as described by Kim et al.  
270 (2021)) and thus of water flowing into the cavity.”

271 On lines 228–229, and elsewhere, it is stated that the observations reported  
272 in the paper are important for establishing mixing rates that can be “incor-  
273 porated into numerical models”. It is not clear to me how these data would  
274 be incorporated into a model. Perhaps the point could be clarified?

275 Thank you, we are happy to expand and clarify how our results may inform  
276 modelling efforts. We have removed the reference to parameterisations in  
277 lines 228–229 and adding the following to the manuscript at the end of sec-  
278 tion 3.2: “Maximum and median values of diapycnal diffusivity  $\kappa$ , vertical  
279 heat flux  $Q_T$ , and vertical salt flux  $Q_S$  from our observations under DIS are  
280 given in Table 2. Our median values of diapycnal diffusivity ( $O(10^{-4} \text{ m}^2 \text{ s}^{-1}$ –  
281  $O(10^{-5} \text{ m}^2 \text{ s}^{-1})$ ) are the same order of magnitude as globally-averaged ocean  
282 values (Waterhouse et al., 2014). The maximum values of diapycnal diffusiv-  
283 ity in our study ( $O(10^{-2} \text{ m}^2 \text{ s}^{-1})$ – $O(10^{-3} \text{ m}^2 \text{ s}^{-1})$ ) match values observed close  
284 to the seabed over rough terrain or at ridges (Waterhouse et al., 2014).

285 Our observations under DIS provide valuable metrics against which turbulent  
286 mixing processes in numerical models could be assessed. Turbulent kinetic  
287 energy dissipation is not modelled or parameterised in regional or  
288 global models. Instead, diapycnal diffusivity  $\kappa$  is parametrised. A common  
289 parametrisation of diapycnal diffusivity in ice shelf cavities is the vertical

290 profile method from Large et al. (1994) (e.g. in ROMS; Gwyther et al.  
 291 (2015) or MITgcm; Nakayama et al. (2017)) which assumes higher values  
 292 of  $\kappa$  in boundary layers than in the interior. The interior mixing is made  
 293 up of contributions from internal waves (parameterised as a constant), from  
 294 shear instability (parameterised from the gradient Richardson number), and  
 295 from double diffusion (parameterised from the double diffusion density ratio)  
 296 (Large et al., 1994). The ice base roughness has been shown to influence  
 297 the ice–ocean boundary layer mixing and the heat and salt flux into the  
 298 boundary layer, and thus the spatial and temporal distribution of ice shelf  
 299 melt (Gwyther et al., 2015). We are not aware of studies investigating the  
 300 effects of spatially variable bottom boundary layer roughness on mixing and  
 301 basal melt in an ice shelf cavity. The range of values for  $\kappa$ , the spatial  
 302 variability, and forcing mechanisms we discuss, can be compared to the values  
 303 and variability of the  $\kappa$  profile parametrisation. This may allow a better  
 304 understanding of the contribution of different drivers to mixing and of how  
 305 realistic model mixing is.

306 Another common choice to parametrize mixing, used in the ISOMIP+ pro-  
 307 tocol (Asay-Davis et al., 2016), is to prescribe constant values for  $\kappa$  in the  
 308 vertical and horizontal, with higher values where the water column stratifi-  
 309 cation is unstable. In stably stratified water, as under DIS, the ISOMIP+  
 310 protocol sets as  $\kappa_{v,stable} = 5 \times 10^{-5} m^2 s^{-1}$  (Asay-Davis et al., 2016). The  
 311 value of  $\kappa$  used in ISOMIP+ has the same order of magnitude as the me-  
 312 dian value in the centre-short dive track ( $2 \times 10^{-5} m^2 s^{-1}$ ), but is an order of  
 313 magnitude lower than the median  $\kappa$  on the east dive track ( $1.1 \times 10^{-4} m^2 s^{-1}$ )  
 314 and 2–3 orders of magnitude lower than the maximum values we find within  
 315 the cavity (Table 2). Thus, the constant value of  $\kappa$  used in ISOMIP+ is a  
 316 good choice for slow flows with low shear over smooth topography, but may  
 317 underestimate mixing in other areas which may in turn influence modelled  
 318 ice-shelf melt. ”

319 On line 230, mention is made of a 100 m thick “melt layer” observed through a  
 320 borehole. What feature are you referring to? The upper 100 m of the borehole  
 321 data shown in Figure 2 appear to indicate the presence of less meltwater than

322 deeper in the water column. Why is that? A shallow intrusion of WW along  
323 the ice shelf base?

324 You are correct that this water may show a shallow intrusion of WW, we  
325 have removed the reference to a melt layer.

326 Lines 197-203 draw comparisons with observations made at Pine Island Ice  
327 Front but point out differences in the physical setting. One difference that  
328 might be relevant, but which appears to have been overlooked, is that in  
329 the case of Pine Island there is a neighboring ice shelf to the north, so the  
330 northern sidewall of the channel confining the Pine Island Ice Shelf does not  
331 extend all the way to the ice front.

332 Thank you for pointing this out, we have changed the relevant paragraph  
333 in the revised manuscript to read: “At the nearby Pine Island Ice Shelf  
334 (PIIS) Naveira Garabato et al. (2017) conducted ADCP and VMP transects  
335 along the calving front. Naveira Garabato et al. (2017) do not detect a fast,  
336 narrow, turbulent inflow current, unlike what we observed at DIS (Figure 3).  
337 High rates of turbulent kinetic energy dissipation below the WW were mostly  
338 confined to the PIIS outflow. The PIIS is connected to another ice shelf cavity  
339 to the north and may receive some of its inflow from under this neighbouring  
340 ice shelf, which may decrease the inflow across the PIIS front and possibly  
341 the turbulent mixing there. Additionally, the ice shelf draft of the PIIS is  
342 deeper ( $\approx 400$  m) than the DIS ( $\approx 350$  m). The ice shelf draft induces a  
343 barotropic jump (an abrupt change in water column thickness, blocking flow  
344 along constant lines of water column thickness) and limits barotropic inflow  
345 to the cavity (A. K. Wåhlin et al., 2020), thus decreasing inflow current  
346 velocities and possibly turbulent mixing. ”

347 The last four paragraphs compare findings with other AUV based observa-  
348 tions of microstructure beneath ice shelves. However, elsewhere the manuscript  
349 highlights the differences between those regions. That makes the discussion  
350 feel like one that is motivated by common methodology rather than common  
351 physical setting. Why overlook borehole measurements of turbulence that  
352 have been made within cavities? Later in the section it is suggested that the

353 AUV track beneath FRIS is 9 km long, but that does not seem to fit with  
354 the figures in the cited paper. At the end the of the section the text again  
355 talks about improving parameterisations of mixing in models, but again, I  
356 don't really see how you would use the data for that.

357 Yes, these are good points, thank you for the suggestions. We have strength-  
358 ened the discussion by adding comparisons with borehole data to the revised  
359 manuscript, we have given details on the revised text above. Apologies for  
360 the incorrect length of the FRIS dive track, this has been corrected. We  
361 have expanded our argument on how our observations can be used to inform  
362 modelling studies, the relevant text is included above.

363 Lines 334-335 suggest that the small vertical heat flux observed means that  
364 a lot of ocean heat can be used to melt ice at the grounding line. But how  
365 much is used there? The outflows at the ice front remain above the freezing  
366 point, so some ocean heat that enters the cavity exits it without being used  
367 for melting. Again, can you estimate some global budgets for the amount of  
368 heat used for melting and the overall average vertical heat flux that could  
369 put your spatially-limited observations in a DIS-cavity-relevant context?

370 These are good suggestions. We have added an estimation of the heat flux in  
371 DIS to the revised manuscript. The paragraph reads: “Equation 2 results in  
372 an estimate of the melt rate of  $\sim 10 \pm 5 \text{ m yr}^{-1}$ , which lies within the range of  
373 published values (e.g. Gourmelen et al., 2017; Lilien et al., 2018; Robertson,  
374 2013; Schodlok et al., 2012; Jenkins et al., 2018). To maintain this melt  
375 rate the vertical heat flux in the cavity would need to be  $100 \pm 50 \text{ W m}^{-2}$ ,  
376 about three orders of magnitude higher than the median values along the  
377 east dive track (Table 2). Rearranging Equation 2 allows us to estimate the  
378 percentage of the heat entering the ice shelf cavity that is used to melt ice.  
379 We estimate that the inflow transports  $4 \pm 2 \text{ TW}$  into the cavity and the  
380 melt takes up  $0.6 \pm 0.4 \text{ TW}$ , thus, only  $\sim 15 \pm 9\%$  of the heat entering DIS  
381 is used to melt the ice shelf. Modelling studies have estimated this value  
382 to be smaller, at 8 % (Jourdain et al., 2017), but within our error range.  
383 Transport calculations by Jenkins et al. (2018) yield the same range for heat

flux into the cavity as our estimate does, however, their calculated melt rate, derived from melt water fluxes, is significantly higher ( $6 \text{ m yr}^{-1} - 33 \text{ m yr}^{-1}$ ). These melt rates would require heat fluxes of  $60 \text{ W m}^{-2} - 317 \text{ W m}^{-2}$ . We need significantly more measurements under ice shelves to understand the role of mixing in different areas and regimes, and its effect on ice shelf melt rate. ”

## References

- Asay-Davis, X. S., Cornford, S. L., Durand, G., Galton-Fenzi, B. K., Gladstone, R. M., Gudmundsson, G. H., ... Seroussi, H. (2016, July). Experimental design for three interrelated marine ice sheet and ocean model intercomparison projects: MISMIP v. 3 (MISMIP +), ISOMIP v. 2 (ISOMIP +) and MISOMIP v. 1 (MISOMIP1). *Geoscientific Model Development*, 9(7), 2471–2497. doi: 10.5194/gmd-9-2471-2016
- Davis, P. E. D., Jenkins, A., Nicholls, K. W., Dutrieux, P., Schröder, M., Janout, M. A., ... McPhail, S. (2022, November). Observations of Modified Warm Deep Water Beneath Ronne Ice Shelf, Antarctica, From an Autonomous Underwater Vehicle. *Journal of Geophysical Research: Oceans*, 127(11). doi: 10.1029/2022jc019103
- Davis, P. E. D., & Nicholls, K. W. (2019, August). Turbulence Observations Beneath Larsen C Ice Shelf, Antarctica. *Journal of Geophysical Research: Oceans*, 124(8), 5529–5550. doi: 10.1029/2019jc015164
- Davis, P. E. D., Nicholls, K. W., Holland, D. M., Schmidt, B. E., Washam, P., Castro, B. F., ... Makinson, K. (2025, February). Lateral Fluxes Drive Basal Melting Beneath Thwaites Eastern Ice Shelf, West Antarctica. *Geophysical Research Letters*, 52(3). doi: 10.1029/2024gl111873
- Dotto, T. S., Sheehan, P. M. F., Zheng, Y., Hall, R. A., Damerell, G. M., & Heywood, K. J. (2025, May). Heterogeneous Mixing Processes Observed in the Dotson Ice Shelf Outflow, Antarctica. *Journal of Geophysical Research: Oceans*, 130(5). doi: 10.1029/2024jc022051

- 413 Dotto, Tiago S, Hall, Robert A, Heywood, Karen J, Provost, Paul, & Platt,  
414 William. (2024). *Lowered Acoustic Doppler Current Profiler (LADCP)*  
415 *data collected in the Amundsen Sea for the TARSAN Project, January -*  
416 *February 2022*. NERC EDS British Oceanographic Data Centre NOC. doi:  
417 10.5285/18A8BE08-07C6-D76C-E063-7086ABC01604
- 418 Erofeeva, S., Greene, C. A., Howard, S. L., Padman, L., & Sutterley, T.  
419 (2024). *CATS2008\_v2023: Circum-Antarctic Tidal Simulation 2008, ver-*  
420 *sion 2023*. U.S. Antarctic Program (USAP) Data Center. doi: 10.15784/  
421 601772
- 422 Girton, J. B., Christianson, K., Dunlap, J., Dutrieux, P., Gobat, J., Lee, C.,  
423 & Rainville, L. (2019). Buoyancy-adjusting Profiling Floats for Exploration  
424 of Heat Transport, Melt Rates, and Mixing in the Ocean Cavities Under  
425 Floating Ice Shelves. In *Oceans 2019 mts/ieee seattle* (p. 1-6). doi: 10  
426 .23919/OCEANS40490.2019.8962744
- 427 Gourmelen, N., Goldberg, D. N., Snow, K., Henley, S. F., Bingham, R. G.,  
428 Kimura, S., . . . van de Berg, W. J. (2017, October). Channelized Melting  
429 Drives Thinning Under a Rapidly Melting Antarctic Ice Shelf. *Geophysical*  
430 *Research Letters*, 44(19), 9796–9804. doi: 10.1002/2017gl074929
- 431 Greene, C. A., Gardner, A. S., Schlegel, N.-J., & Fraser, A. D. (2022, Au-  
432 gust). Antarctic calving loss rivals ice-shelf thinning. *Nature*, 609(7929),  
433 948–953. doi: 10.1038/s41586-022-05037-w
- 434 Gwyther, D. E., Galton-Fenzi, B. K., Dinniman, M. S., Roberts, J. L., &  
435 Hunter, J. R. (2015, November). The effect of basal friction on melting  
436 and freezing in ice shelf–ocean models. *Ocean Modelling*, 95, 38–52. doi:  
437 10.1016/j.ocemod.2015.09.004
- 438 Jenkins, A., Shoosmith, D., Dutrieux, P., Jacobs, S., Kim, T. W., Lee, S. H.,  
439 . . . Stammerjohn, S. (2018, August). West Antarctic Ice Sheet retreat  
440 in the Amundsen Sea driven by decadal oceanic variability. *Nature Geo-*  
441 *science*, 11(10), 733–738. doi: 10.1038/s41561-018-0207-4

- 442 Jourdain, N. C., Mathiot, P., Merino, N., Durand, G., Le Sommer, J., Spence,  
443 P., ... Madec, G. (2017, March). Ocean circulation and sea-ice thinning  
444 induced by melting ice shelves in the jscplAj/scplmundsen jscplSi/scplsea.  
445 *Journal of Geophysical Research: Oceans*, 122(3), 2550–2573. doi: 10  
446 .1002/2016jc012509
- 447 Kim, T., Yang, H. W., Dutrieux, P., Wåhlin, A. K., Jenkins, A., Kim, Y. G.,  
448 ... Cho, Y. (2021, December). Interannual Variation of Modified Circum-  
449 polar Deep Water in the Dotson-Getz Trough, West Antarctica. *Journal*  
450 *of Geophysical Research: Oceans*, 126(12). doi: 10.1029/2021jc017491
- 451 Kimura, S., Jenkins, A., Dutrieux, P., Forryan, A., Naveira Garabato,  
452 A. C., & Firing, Y. (2016, December). Ocean mixing beneath Pine Is-  
453 land Glacier ice shelf, West Antarctica: OCEAN MIXING BENEATH  
454 FIG. *Journal of Geophysical Research: Oceans*, 121(12), 8496–8510. doi:  
455 10.1002/2016jc012149
- 456 Large, W. G., McWilliams, J. C., & Doney, S. C. (1994, November). Oceanic  
457 vertical mixing: A review and a model with a nonlocal boundary layer  
458 parameterization. *Reviews of Geophysics*, 32(4), 363–403. doi: 10.1029/  
459 94rg01872
- 460 Lilien, D. A., Joughin, I., Smith, B., & Shean, D. E. (2018, April). Changes  
461 in flow of Crosson and Dotson ice shelves, West Antarctica, in response  
462 to elevated melt. *The Cryosphere*, 12(4), 1415–1431. doi: 10.5194/tc-12  
463 -1415-2018
- 464 Milillo, P., Rignot, E., Rizzoli, P., Scheuchl, B., Mouginot, J., Bueso-Bello,  
465 J. L., ... Dini, L. (2022, January). Rapid glacier retreat rates observed in  
466 West Antarctica. *Nature Geoscience*, 15(1), 48–53. doi: 10.1038/s41561  
467 -021-00877-z
- 468 Mouginot, J., Rignot, E., & Scheuchl, B. (2014, March). Sustained increase  
469 in ice discharge from the Amundsen Sea Embayment, West Antarctica,  
470 from 1973 to 2013. *Geophysical Research Letters*, 41(5), 1576–1584. doi:  
471 10.1002/2013gl059069



- 472 Nakayama, Y., Menemenlis, D., Schodlok, M., & Rignot, E. (2017, August).  
 473 Amundsen and `jscriBi/scrEllingshausen` `jscriSi/scrEas` simulation with  
 474 optimized ocean, sea ice, and thermodynamic ice shelf model parameters.  
 475 *Journal of Geophysical Research: Oceans*, 122(8), 6180–6195. doi: 10  
 476 .1002/2016jc012538
- 477 Naveira Garabato, A. C., Forryan, A., Dutrieux, P., Brannigan, L., Biddle,  
 478 L. C., Heywood, K. J., ... Kimura, S. (2017, January). Vigorous lat-  
 479 eral export of the meltwater outflow from beneath an Antarctic ice shelf.  
 480 *Nature*, 542(7640), 219–222. doi: 10.1038/nature20825
- 481 Padman, L., Fricker, H. A., Coleman, R., Howard, S., & Erofeeva, L. (2002).  
 482 A new tide model for the Antarctic ice shelves and seas. *Annals of Glaciol-  
 483 ogy*, 34, 247–254. doi: 10.3189/172756402781817752
- 484 Paolo, F. S., Fricker, H. A., & Padman, L. (2015, April). Volume loss from  
 485 Antarctic ice shelves is accelerating. *Science*, 348(6232), 327–331. doi:  
 486 10.1126/science.aaa0940
- 487 Rignot, E., Jacobs, S., Mouginot, J., & Scheuchl, B. (2013, July). Ice-Shelf  
 488 Melting Around Antarctica. *Science*, 341(6143), 266–270. doi: 10.1126/  
 489 science.1235798
- 490 Rignot, E., Mouginot, J., Morlighem, M., Seroussi, H., & Scheuchl, B. (2014,  
 491 May). Widespread, rapid grounding line retreat of Pine Island, Thwaites,  
 492 Smith, and Kohler glaciers, West Antarctica, from 1992 to 2011. *Geophys-  
 493 ical Research Letters*, 41(10), 3502–3509. doi: 10.1002/2014gl060140
- 494 Rignot, E., Mouginot, J., Scheuchl, B., van den Broeke, M., van Wessem,  
 495 M. J., & Morlighem, M. (2019, January). Four decades of Antarctic Ice  
 496 Sheet mass balance from 1979–2017. *Proceedings of the National Academy  
 497 of Sciences*, 116(4), 1095–1103. doi: 10.1073/pnas.1812883116
- 498 Robertson, R. (2013, June). Tidally induced increases in melting of Amund-  
 499 sen Sea ice shelves. *Journal of Geophysical Research: Oceans*, 118(6),  
 500 3138–3145. doi: 10.1002/jgrc.20236

- 501 Scheuchl, B., Mouginot, J., Rignot, E., Morlighem, M., & Khazendar, A.  
502 (2016, August). Grounding line retreat of Pope, Smith, and Kohler  
503 Glaciers, West Antarctica, measured with Sentinel-1a radar interferom-  
504 etry data. *Geophysical Research Letters*, 43(16), 8572–8579. doi: 10.1002/  
505 2016gl069287
- 506 Schodlok, M. P., Menemenlis, D., Rignot, E., & Studinger, M. (2012). Sensi-  
507 tivity of the ice-shelf/ocean system to the sub-ice-shelf cavity shape mea-  
508 sured by NASA IceBridge in Pine Island Glacier, West Antarctica. *Annals*  
509 *of Glaciology*, 53(60), 156–162. doi: 10.3189/2012aog60a073
- 510 Thurnherr, A. M. (2021). *How To Process LADCP Data*  
511 *With the LDEO Software (Version IX.14)*. Retrieved from  
512 <https://www.ldeo.columbia.edu/~ant/LADCP.html>.  
513 <https://www.ldeo.columbia.edu/ant/LADCP.html>.
- 514 Venables, E., Nicholls, K., Wolk, F., Makinson, K., & Anker, P. (2014). Mea-  
515 suring turbulent dissipation rates beneath an Antarctic ice shelf. *Marine*  
516 *Technology Society Journal*, 48(5), 18–24. doi: 10.4031/mts.48.5.8
- 517 Wåhlin, A., Alley, K. E., Begeman, C., Hegrenæs, Ø., Yuan, X., Graham,  
518 A. G. C., . . . Heywood, K. J. (2024, August). Swirls and scoops: Ice base  
519 melt revealed by multibeam imagery of an Antarctic ice shelf. *Science*  
520 *Advances*, 10(31). doi: 10.1126/sciadv.adn9188
- 521 Wåhlin, A. K., Steiger, N., Darelius, E., Assmann, K. M., Glessmer, M. S.,  
522 Ha, H. K., . . . Viboud, S. (2020, February). Ice front blocking of ocean  
523 heat transport to an Antarctic ice shelf. *Nature*, 578(7796), 568–571. doi:  
524 10.1038/s41586-020-2014-5
- 525 Waterhouse, A. F., MacKinnon, J. A., Nash, J. D., Alford, M. H., Kunze, E.,  
526 Simmons, H. L., . . . Lee, C. M. (2014, July). Global Patterns of Diapycnal  
527 Mixing from Measurements of the Turbulent Dissipation Rate. *Journal of*  
528 *Physical Oceanography*, 44(7), 1854–1872. doi: 10.1175/jpo-d-13-0104.1

529 Yang, H. W., Kim, T.-W., Dutrieux, P., Wåhlin, A. K., Jenkins, A., Ha,  
530 H. K., ... Cho, Y.-K. (2022, March). Seasonal variability of ocean cir-  
531 culation near the Dotson Ice Shelf, Antarctica. *Nature Communications*,  
532 13(1). doi: 10.1038/s41467-022-28751-5
